# Supplementary material for: Determination of proline in human plasma samples using the encapsulation of proline dehydrogenase enzyme in dendritic silica: a new platform for the enzymatic biosensing of amino acids
Source: Royal Society of Chemistry journal article supplement (doi:10.1039/c9ay01732a), 2019-01-01
Supplement: c9ay01732a1.pdf [file c9ay01732a1.pdf]

## Supporting Information

### **Determination of proline in human plasma samples using encapsulation of proline dehydrogenase enzyme in dendritic silica: A new platform for the enzymatic biosensing of amino acids**

Arezoo Mirzaie <sup>a</sup>, Arezoo Saadati <sup>b</sup>, Soodabeh Hassanpour <sup>c</sup>, Mohammad Hasanzadeh <sup>c\*</sup>,  
Mohammadreza Siahi-Shadbad <sup>e</sup>, Abolghasem Jouyban <sup>b</sup>

<sup>a</sup> Student Research Committee, Faculty of pharmacy, Tabriz University of Medical Sciences,  
Tabriz, Iran

<sup>b</sup> Pharmaceutical Analysis Research Center and Faculty of Pharmacy, Tabriz University of  
Medical Sciences, Tabriz, Iran

<sup>c</sup> Drug Applied Research Center, Tabriz University of Medical Sciences, Tabriz, Iran

<sup>d</sup> Liver and Gastrointestinal Diseases Research Center, Tabriz University of Medical Sciences,  
Tabriz, Iran.

<sup>e</sup> Food and Drug Safety Research Center, Tabriz University of Medical Sciences, Tabriz, Iran.

#### **Corresponding authors.**

Drug Applied Research Center, Tabriz University of Medical Sciences, Tabriz, Iran

\* [hasanzadehm@tbzmed.ac.ir](mailto:hasanzadehm@tbzmed.ac.ir); [mhmmd\\_hasanzadeh@yahoo.com](mailto:mhmmd_hasanzadeh@yahoo.com)

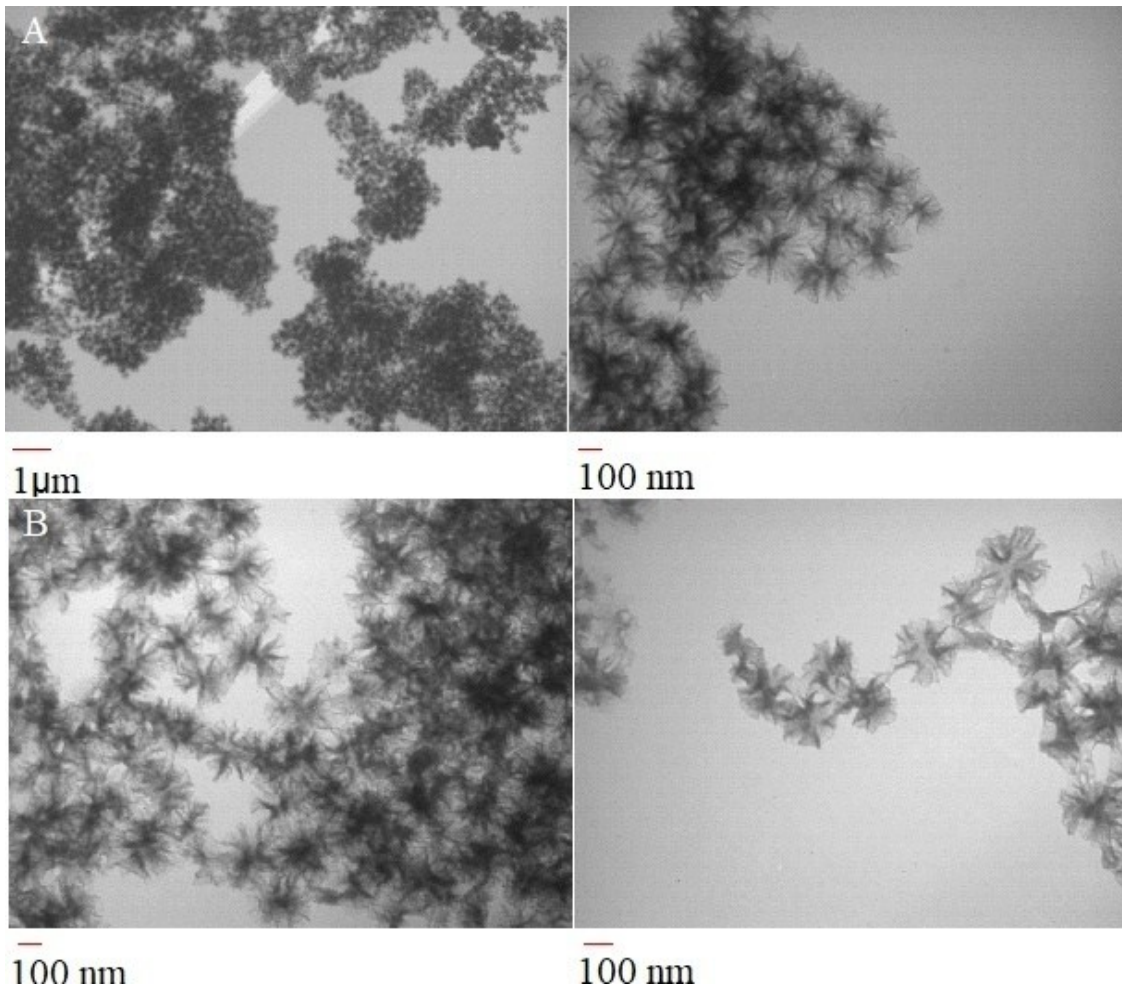

*Fig. 1S. KCC-1 (A), KCC-1-NH<sub>2</sub> (B)*

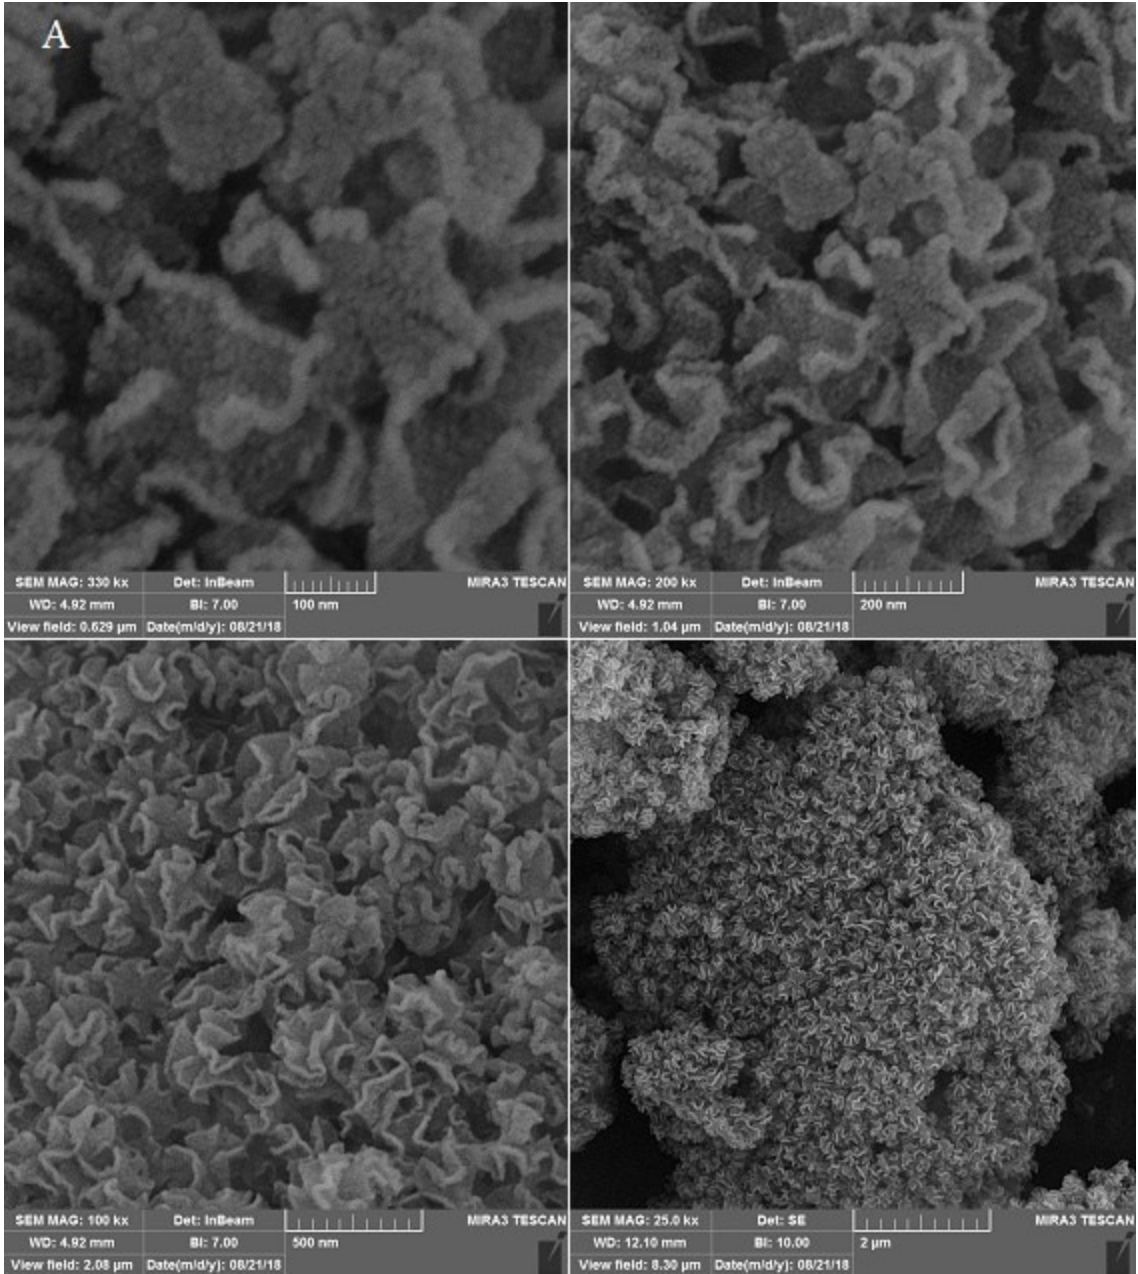

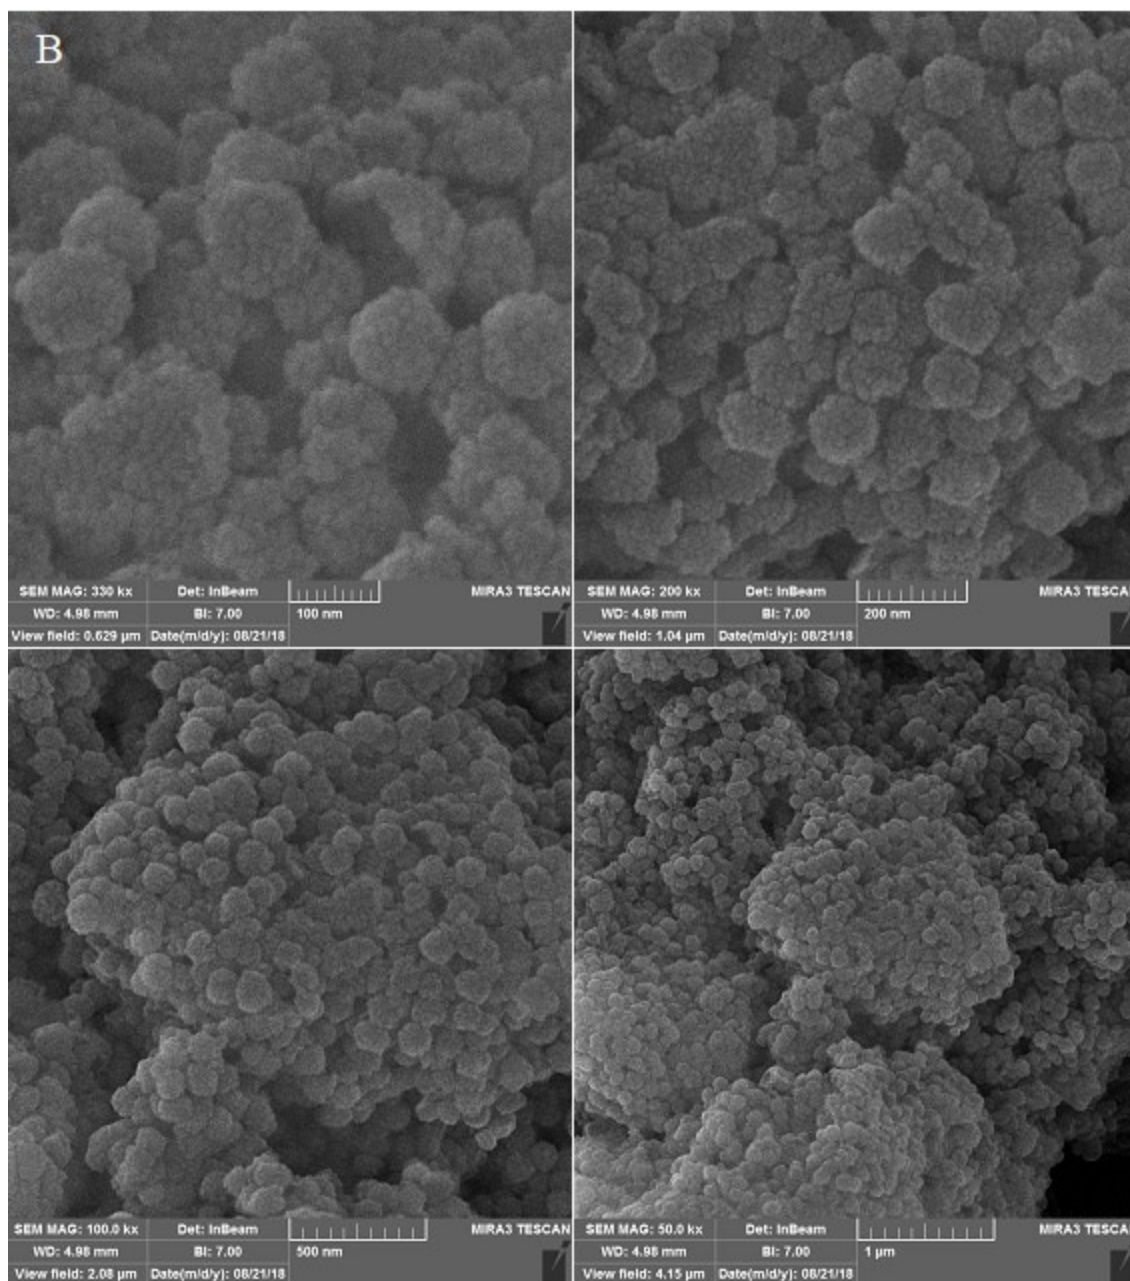

Fig. 2S. FE-SEM images of KCC-1 (A), KCC-1-NH<sub>2</sub> (B)

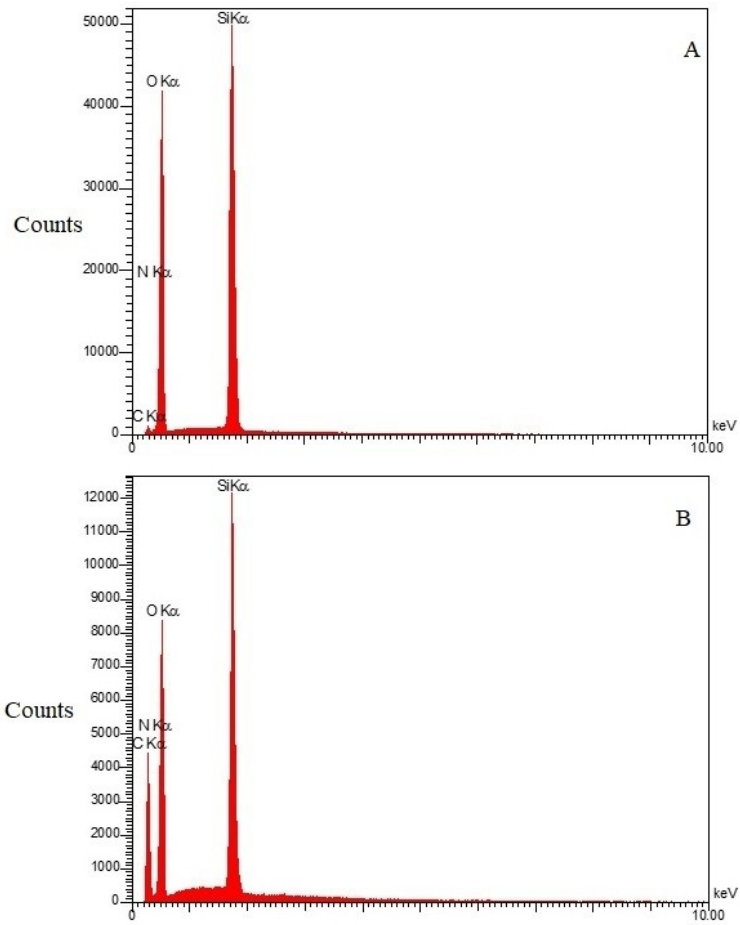

Fig. 3S. EDX analysis of KCC-1 (A), KCC-1-NH<sub>2</sub> (B)

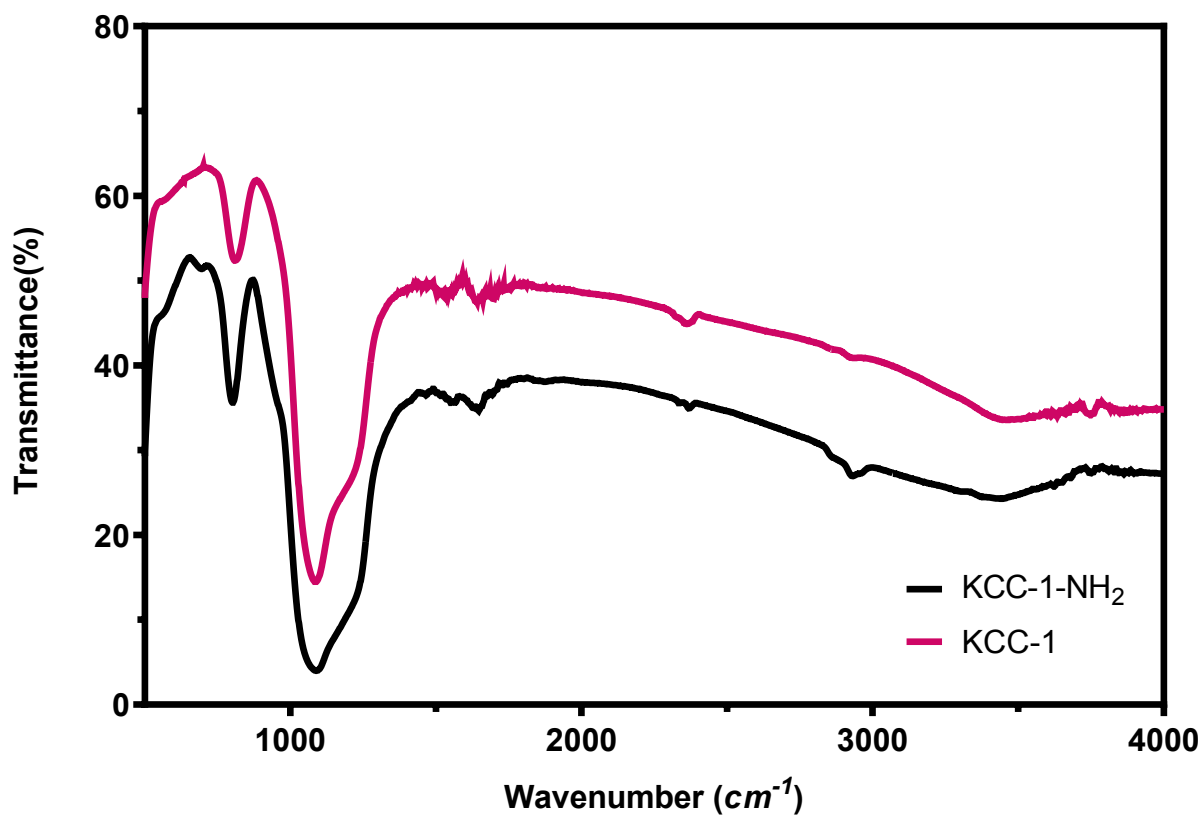

Fig. 4S. FTIR spectra of the KCC-1 and KCC-1-NH<sub>2</sub>

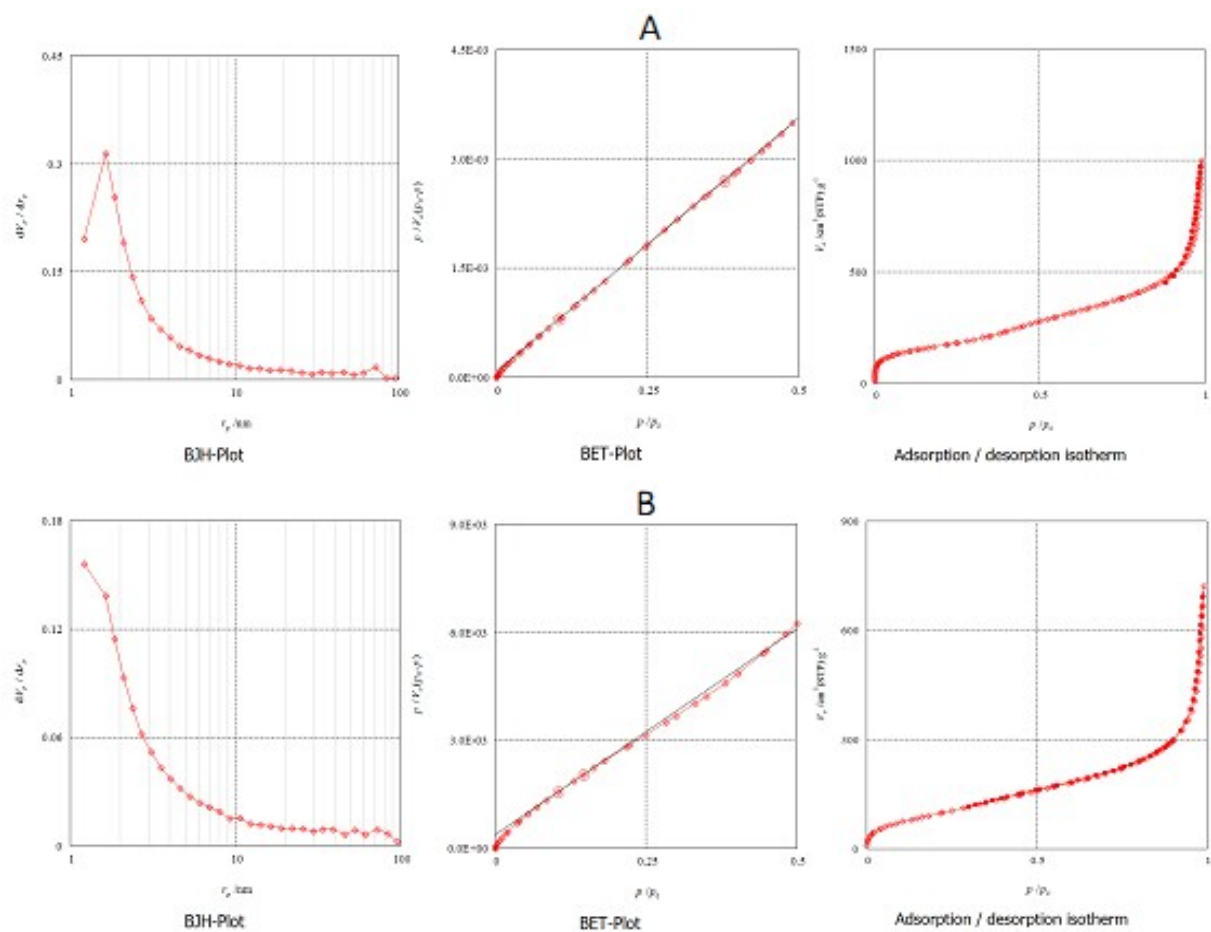

Fig. 5S. BJH, BET and nitrogen adsorption/desorption isotherm of KCC-1 (A), KCC-1-NH<sub>2</sub> (B). ( $P/P_0$ = relative pressure (surface pressure/preliminary pressure)).

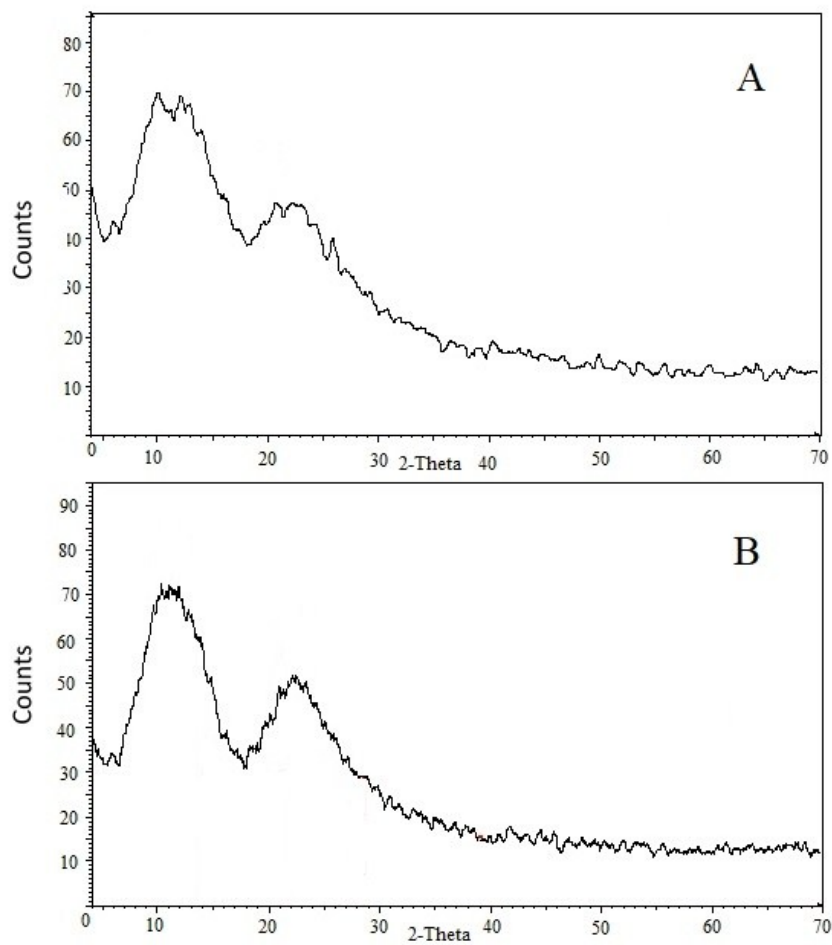

*Fig. 6S. XRD analysis of KCC-1 (A), and KCC-1-NH<sub>2</sub> (B)*



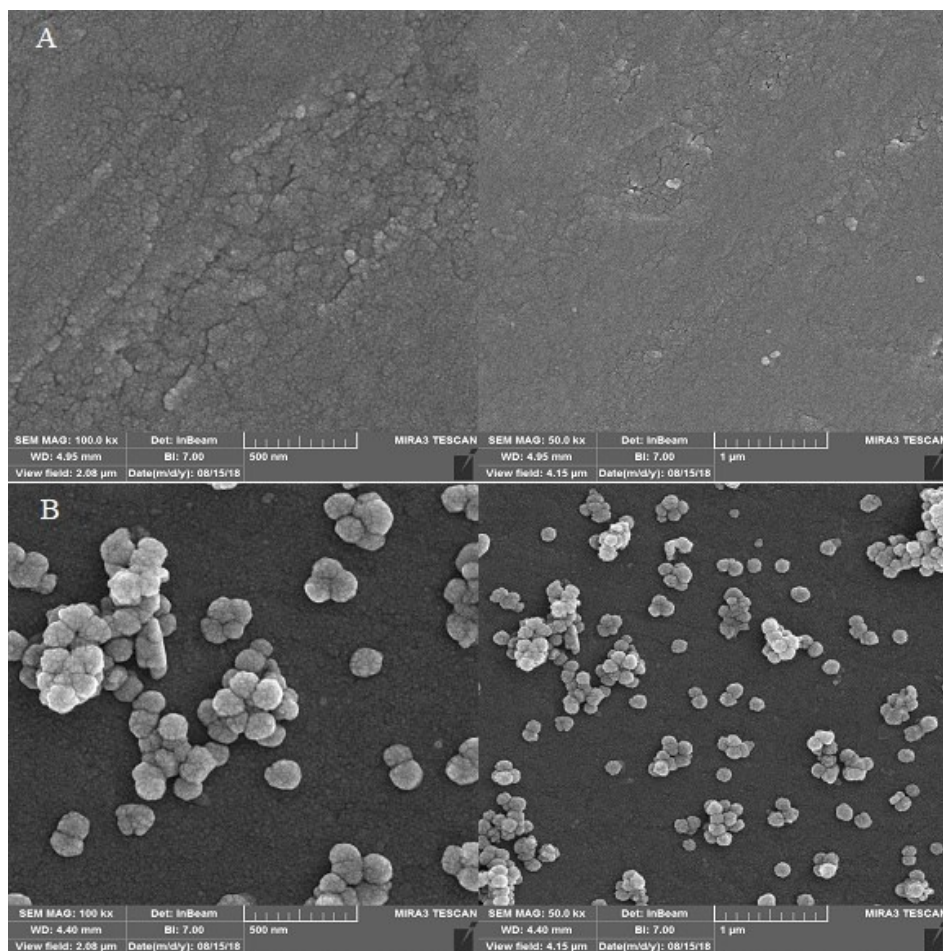

Fig. 7S. FESEM images of the KCC-1 (A), and KCC-1-NH<sub>2</sub> (B) modified GCE electrodes

Table 1S. Surface area, average pore size, and pore volume of KCC-1, and KCC-1-NH<sub>2</sub>.

| Material type         | Pore size (nm) <sup>a</sup> | Pore volume (cm <sup>3</sup> g <sup>-1</sup> ) <sup>b</sup> | Surface Area (m <sup>2</sup> g <sup>-1</sup> ) |
|-----------------------|-----------------------------|-------------------------------------------------------------|------------------------------------------------|
| KCC-1                 | 9.9                         | 1.5                                                         | 617                                            |
| KCC-1-NH <sub>2</sub> | 11.9                        | 1.1                                                         | 367                                            |

a Pore size was calculated by BET. b Pore volume determined by BJH.

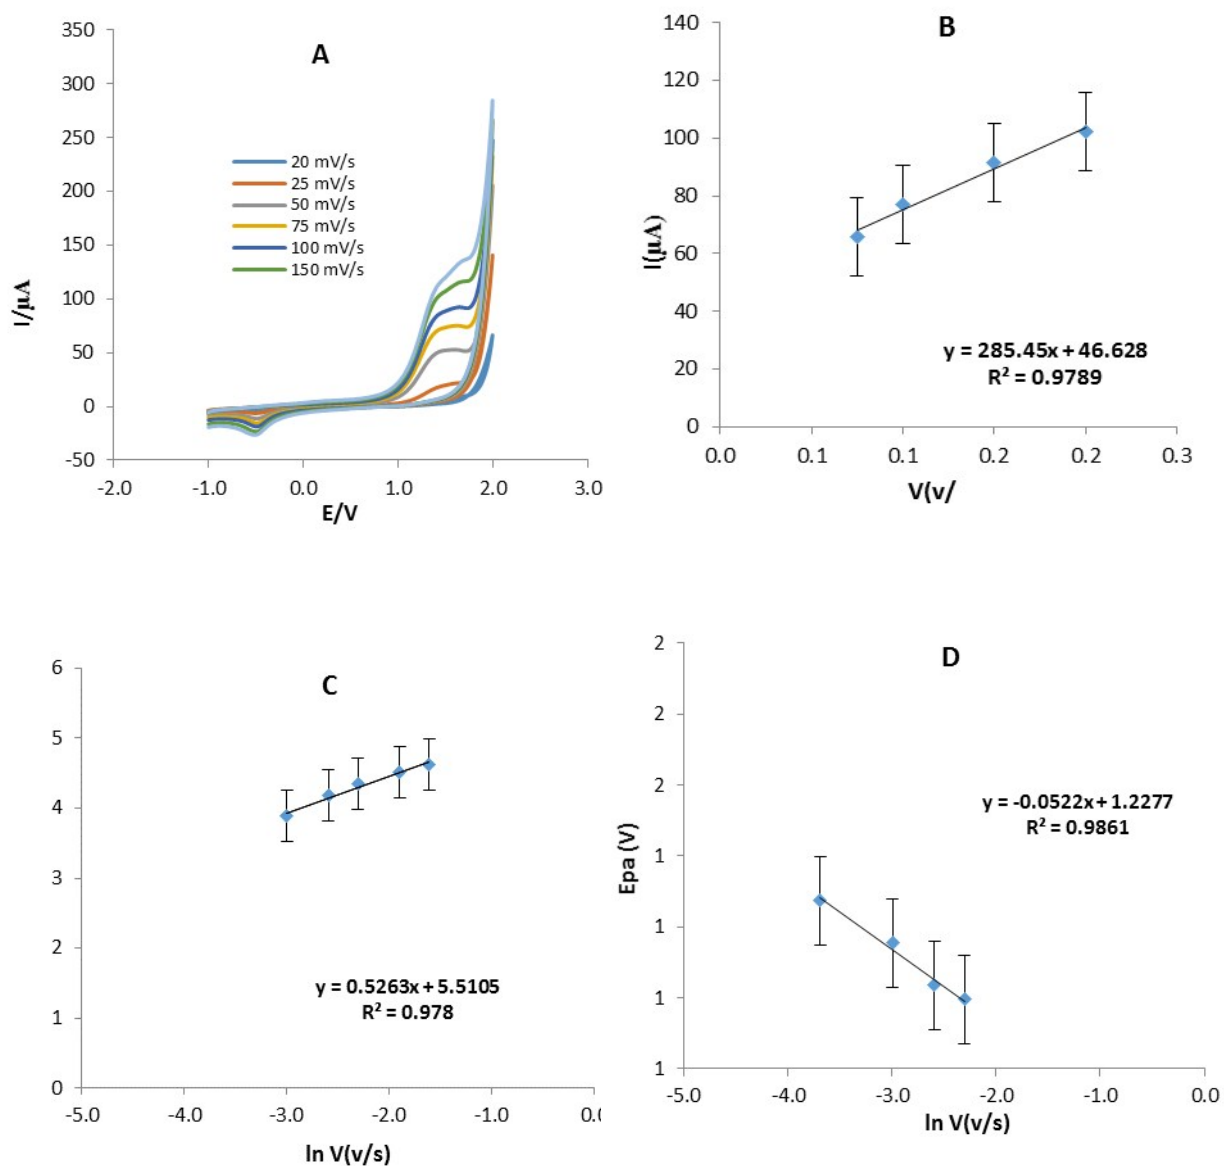

**Fig. 8S.** (A) CVs of PRODH-KCC-1-NH<sub>2</sub>-GCE in the presence of 34 mM of L-Pro in 0.1M PBS in different potential sweep rates (20-200mV/s). (B) Dependency of oxidation peak currents versus scan rates. (C) Variation of Ln I<sub>pa</sub> versus Ln V. (D) The plot of oxidation peak potentials versus neperian logarithm of sweep rates.

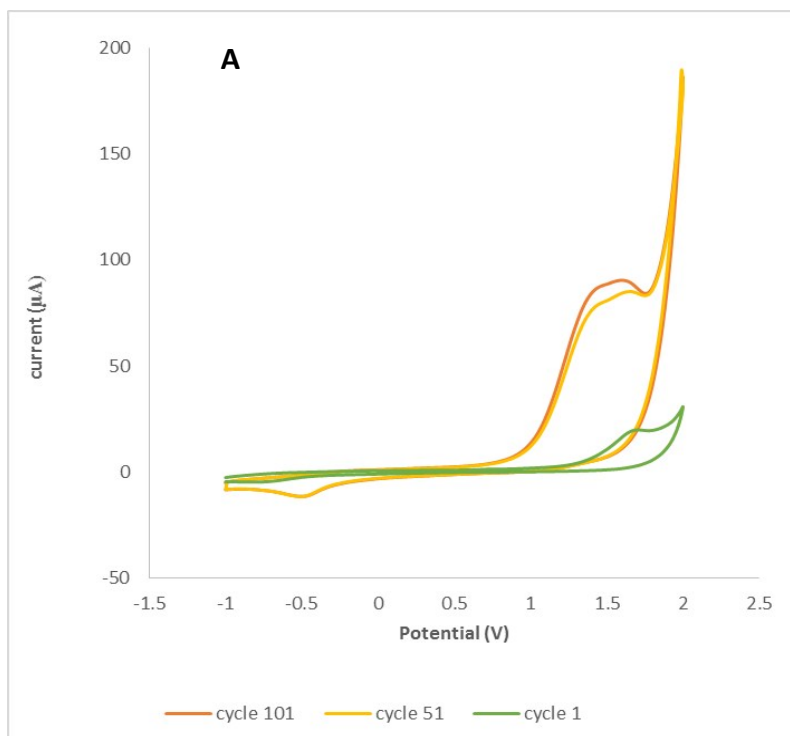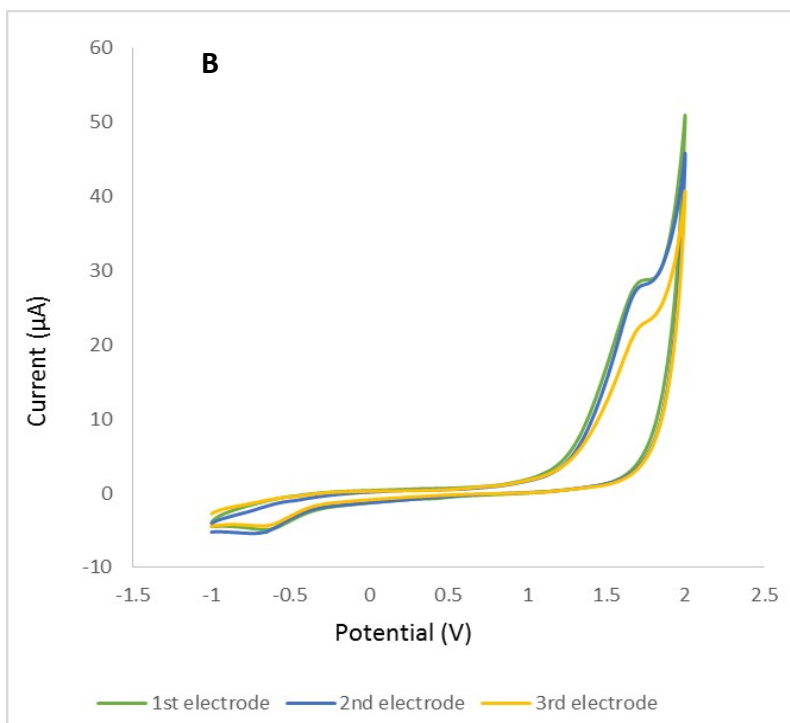

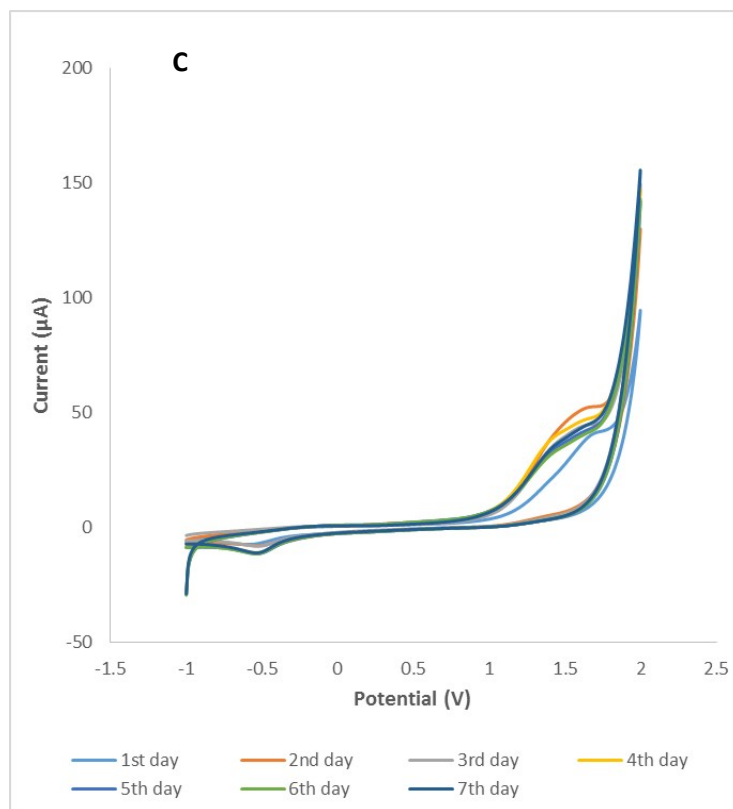

**Fig. 9S:** **A)** CVs of enzyme biosensor in different cycle number, **B)** CV of three similar enzyme biosensor with the same concentration of solution (supporting electrolyte) **C)** CV of enzyme biosensor in different time of storage.
